# Supplementary material for: Anti-Staphylococcal Activity of Ligilactobacillus animalis SWLA-1 and Its Supernatant against Multidrug-Resistant Staphylococcus pseudintermedius in Novel Rat Model of Acute Osteomyelitis
Source: MDPI journal article supplement (doi:10.3390/antibiotics12091444), 2023-09-13
Supplement: s1 [file s1]

**Table S1.** Antimicrobial susceptibility profile of the *Staphylococcus pseudintermedius* KUVM1701GC strain with the minimum inhibitory concentration.

| Antibiotics                       | MIC (µg/mL) |      |     |   |   |   |       |    |    |    |      | Resistance<br>breakpoint (µg/ml) |
|-----------------------------------|-------------|------|-----|---|---|---|-------|----|----|----|------|----------------------------------|
|                                   | ≤0.125      | 0.25 | 0.5 | 1 | 2 | 4 | 8     | 16 | 32 | 64 | 128≤ |                                  |
| Ciprofloxacin                     |             |      |     |   |   |   |       | 16 |    |    |      | 1                                |
| Clindamycin                       |             |      |     |   | 2 |   |       |    |    |    |      | 4                                |
| Imipenem                          |             |      |     | 1 |   |   |       |    |    |    |      | 4                                |
| Cefotaxime                        |             |      |     |   |   |   |       |    | 32 |    |      | 32                               |
| Ampicillin                        |             |      |     |   |   |   |       |    |    | 64 |      | 0.5                              |
| Oxacillin                         |             |      |     |   |   |   |       | 16 |    |    |      | 0.5                              |
| Ceftriaxone                       |             |      |     |   |   |   |       |    | 32 |    |      | 4                                |
| Tetracycline                      |             |      |     |   |   |   |       |    |    | 64 |      | 1                                |
| Chloramphenicol                   |             |      |     |   |   |   |       |    | 32 |    |      | 32                               |
| Gentamicin                        |             |      |     |   |   |   |       | 16 |    |    |      | 16                               |
| Azithromycin                      |             |      |     |   |   |   |       |    | 32 |    |      | 2                                |
| Amikacin                          |             |      |     |   |   | 4 |       |    |    |    |      | 16                               |
| Trimethoprim/<br>Sulfamethoxazole |             |      |     |   |   |   | 8/152 |    |    |    |      | 4/76                             |
| Ceftazidime                       |             |      |     |   |   |   |       | 16 |    |    |      | 1                                |

Minimum inhibitory concentration (MIC) values were determined according to Clinical and Laboratory Standards Institute protocols M100, vet01 (CLSI, 2019) and The European Committee on Antimicrobial Susceptibility Testing Version 11.0 (EUCAST, 2021). Red background - resistant, grey background - susceptible
